# Supplementary material
Source: PubMed Central journal article supplement (PMC6425935)
Supplement: NIHMS1519132-supplement-3.pdf [file NIHMS1519132-supplement-3.pdf]

**Supplementary Table S1** Oligonucleotide sequences used for quantitative real-time PCR validation

|                            | <b>Gene Symbo</b>                   | <b>Official Full Name</b>                                       | <b>Primers Sequences</b>                                               |
|----------------------------|-------------------------------------|-----------------------------------------------------------------|------------------------------------------------------------------------|
| <b>nCounter Stem Cell</b>  | FOXD3                               | forkhead box D3                                                 | Forward: GCAACTACTGGACCCTGGAC<br>Reverse: CTGTAAGCGCCGAAGCTCT          |
|                            | FZD10                               | frizzled class receptor 10                                      | Forward: GCTCAAGTGCTCCCCGATTA<br>Reverse: GCCTCCATGCACAGGTAGTT         |
|                            | GAS1                                | growth arrest specific 1                                        | Forward: GTCAACTTGGTGTAGCCGGT<br>Reverse: GTTCTGTCCCCACATGCTT          |
|                            | WNT3                                | Wnt family member 3                                             | Forward: AGGACAAGTATGACAGCGCC<br>Reverse: GGTGGCTTGAAGAGCGAGTA         |
|                            | NOTCH4                              | notch 4                                                         | Forward: ATGCGAGGAAGATACGGAGTGG<br>Reverse: TCGGAATGTTGGAGGCAGAAC      |
|                            | OCT4                                | POU class 5 homeobox 1                                          | Forward: GGAAGGTATTCAGCCAAACGACCA<br>Reverse: CTCACTCGGTTCTCGATACTGGTT |
|                            | GDF3                                | growth differentiation factor 3                                 | Forward: GGTGGTGACTCTCAACCCTG<br>Reverse: GGCAATGATCCACTTGTGCC         |
|                            | NANOG                               | Nanog homeobox                                                  | Forward: CTGCAGAGAAGAGTGTGCGA<br>Reverse: CCTTCTGCGTCACACCATTG         |
|                            | MAPK10                              | mitogen-activated protein kinase 10                             | OriGene Technologies, Rockville, MD                                    |
| <b>nCounter Customized</b> | CRIPTO-1 /TDGF-1                    | teratocarcinoma-derived growth factor 1                         | Forward: CACGATGTGCGCAAAGAGAA<br>Reverse: TGACCGTGCCAGCATTTACA         |
|                            | FOXC2                               | forkhead box C2                                                 | Forward: GCCTAAGGACCTGGTGAAGC<br>Reverse: TTGACGAAGCACTCGTTGAG         |
|                            | SOX17                               | SRY-box 17                                                      | Forward: TTCGTGTGCAAGCCTGAGAT<br>Reverse: TAATATAACGCGGAGCTGGC         |
|                            | T                                   | T brachyury transcription factor                                | Forward: GCGCGAGAACAGCACTACTA<br>Reverse: GACCAAGACTGTCCCCGCTC         |
|                            | AFP                                 | alpha fetoprotein                                               | Forward: TGCAGCCAAAGTGAAGAGGGAAGA<br>Reverse: CATAGCGAGCAGCCCAAAGAAGAA |
|                            | GATA3                               | GATA binding protein 3                                          | Forward: CCTAAGGTGGTTGTGCTCGG<br>Reverse: CACAGGCTGCAGGAATAGGG         |
|                            | KIT                                 | KIT proto-oncogene receptor tyrosine kinase                     | Forward: CTTTCAACTTGCATCCA ACTCC<br>Reverse: CCATACCTCCCTCTCTTTTCC     |
|                            | SOX2                                | SRY-box 2                                                       | Forward: GGATAAGTACACGCTGCCCCG<br>Reverse: ATGTGCGCGTAACTGTCCAT        |
| NODAL                      | nodal growth differentiation factor | Forward: AGGGCGAGTGTCTAATCTCT<br>Reverse: ACGTTTCAGCAGACTCTGGAT |                                                                        |
| <b>Endogenous Gene</b>     | HPRT                                | hypoxanthine phosphoribosyltransferase 1                        | Forward: TGACTACTGGCAAACAATGCA<br>Reverse: GGTCTTTTTACCAGCAAGCT        |
